# Supplementary material for: Survival prediction of kidney renal papillary cell carcinoma by comprehensive LncRNA characterization
Source: PubMed Central journal article supplement (PMC5762286; doi:10.18632/oncotarget.22732), 2017-11-28
Supplement: oncotarget-08-110811-s001.pdf [file oncotarget-08-110811-s001.pdf]

# Survival prediction of kidney renal papillary cell carcinoma by comprehensive LncRNA characterization

## SUPPLEMENTARY MATERIALS

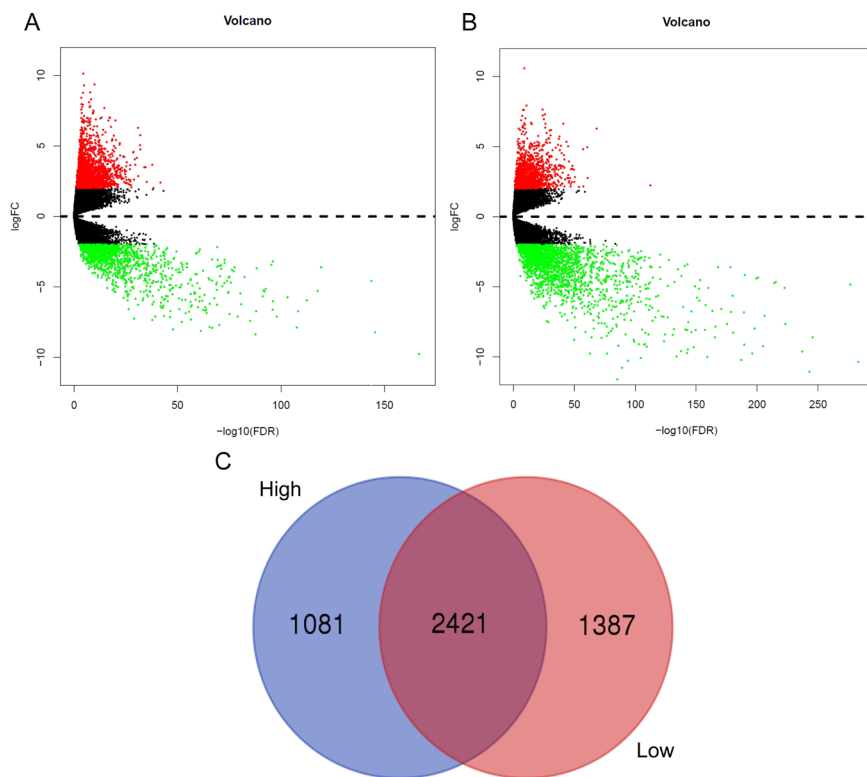

**Supplementary Figure 1: Differentially expressed genes (DEGs) analysis.** (A) Volcano plot of DEGs in high risk score group of kidney renal papillary cell carcinoma (KIRP) and normal kidney samples. (B) Volcano plot of DEGs in low risk score group and normal kidney samples. DEGs identified using the edgeR package with  $\text{Padj} < 0.05$  and  $|\log_2\text{FC}| > 2$ . Volcano plot was drawn by the gplots package. (C) Venn diagrams of overlapping genes from DEGs. Blue: DEGs from high risk score group of KIRP and normal kidney samples, Light purple: DEGs from low risk score group of KIRP and normal kidney samples, Dark purple: overlapping genes.

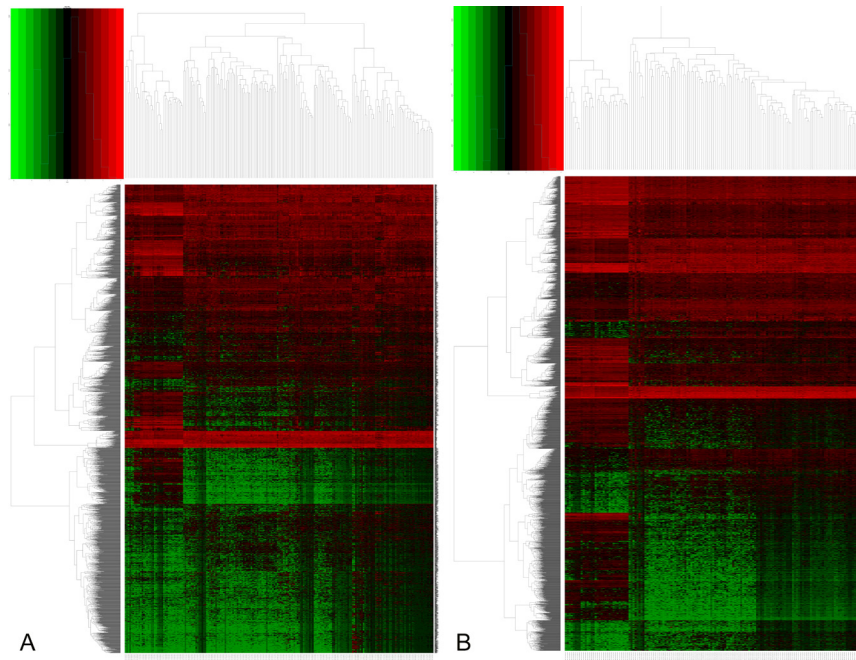

**Supplementary Figure 2: Heatmap of differentially expressed genes (DEGs) in kidney renal papillary cell carcinoma (KIRP).** (A) Heatmap of DEGs in high risk score group of KIRP and normal kidney samples. (B) Heatmap of DEGs in low risk score group of KIRP and normal kidney samples. DEGs identified using the edgeR package with  $\text{Padj} < 0.05$  and  $|\log_2\text{FC}| > 2$ . Heatmap was generated by the pheatmap package.

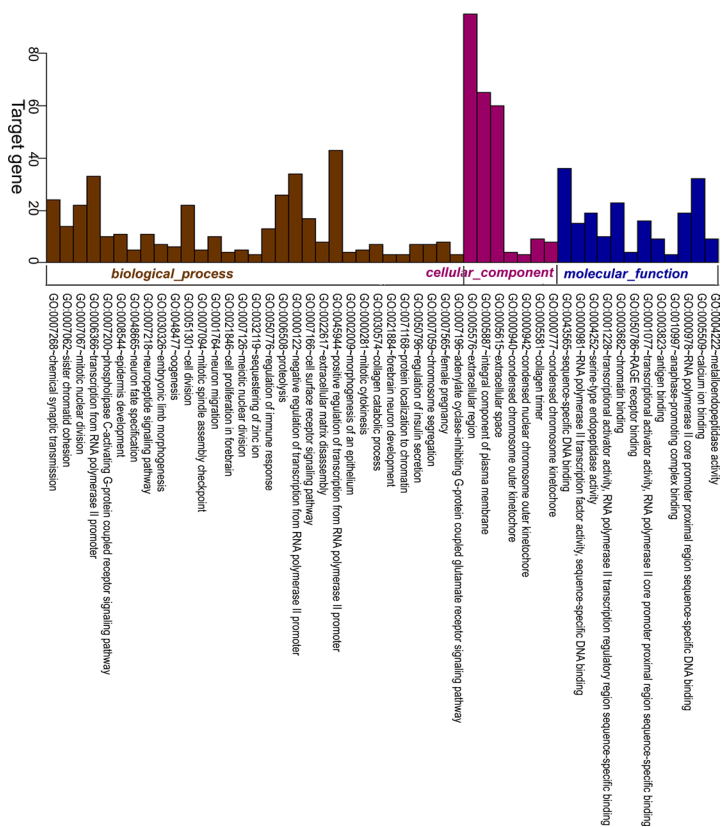

**Supplementary Figure 3: Gene Ontology (GO) annotation of 1081 differentially expressed genes in high risk group.** The bar plot of GO Annotation was generated by R language with top 50 items. GO Annotation was generated using DAVID online tool.



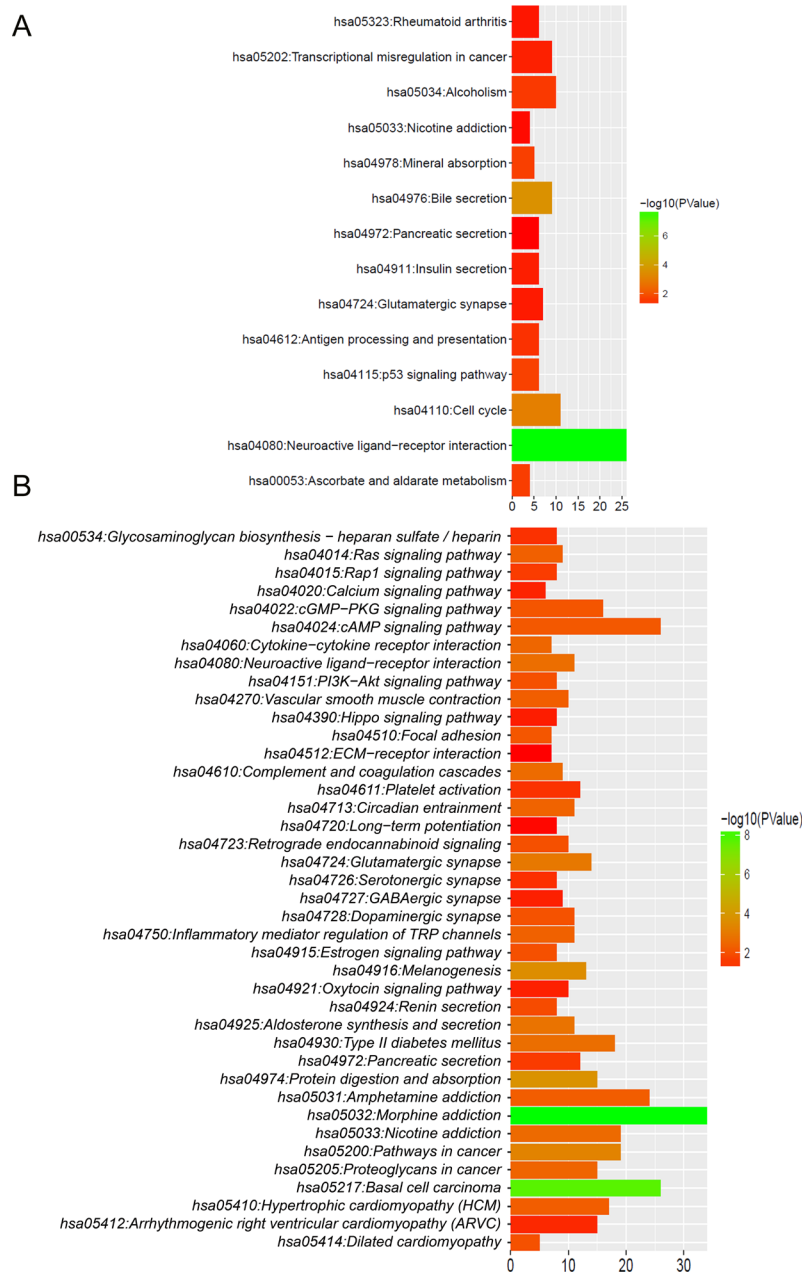

**Supplementary Figure 5: Kyoto Encyclopedia of Genes and Genomes (KEGG) pathways.** KEGG Pathways were drawn by the ggplot2 package in R language. (A) Kyoto Encyclopedia of Genes and Genomes (KEGG) pathways of 1081 differentially expressed genes in high risk group. The horizontal axis showed the number of genes. Column color represented the  $-\log_{10}(P\text{-Value})$ . Green: high degree of enrichment, red: low degree of enrichment. KEGG Pathways were identified by DAVID online tool. (B) Kyoto Encyclopedia of Genes and Genomes (KEGG) pathways of 1387 differentially expressed genes in low risk group.
